# Supplementary material
Source: PubMed Central journal article supplement (PMC3146620)
Supplement: 11_72_Gehrau_Suppl.pdf [file 11_72_Gehrau_Suppl.pdf]

**Supplementary Table S1A** Characteristics of the patients' study group

| Parameter                     | Variable | HCV-ACR (n = 10)  | HCV-recurrence (n = 22) | <i>p</i> -value |
|-------------------------------|----------|-------------------|-------------------------|-----------------|
| Age in years (range)          |          | 50 (43-54)        | 54 (46-60)              | 0.061           |
| Race                          | White    | 8                 | 13                      | 0.254           |
|                               | Black    | 2                 | 4                       |                 |
|                               | Other    | 0                 | 5                       |                 |
| Gender                        | Female   | 5                 | 7                       | 0.554           |
|                               | Male     | 5                 | 15                      |                 |
| Time post-LT in month (range) |          | 3 (1-11)          | 20 (1-67)               | 0.045           |
| HCV (IU/ml)                   |          | 5.14E06 ± 4.81E06 | 6.02E06 ± 3.56E06       | 0.665           |

**Supplementary Table S1B** Characteristics of the patients' validation group

| Parameter                     | Variable | HCV-ACR (n = 10)  | HCV-recurrence (n = 9) | p-value |
|-------------------------------|----------|-------------------|------------------------|---------|
| Age in years (range)          |          | 50 (37-65)        | 58 (49-66)             | 0.023   |
| Race                          | White    | 6                 | 9                      | 0.116   |
|                               | Black    | 4                 | 0                      |         |
| Gender                        | Female   | 5                 | 3                      | 0.791   |
|                               | Male     | 5                 | 6                      |         |
| Time post-LT in month (range) |          | 4 (1-10)          | 5 (1-14)               | 0.606   |
| HCV (IU/ml)                   |          | 1.89E06 ± 3.42E06 | 9.14E07 ± 1.93E08      | 0.184   |

Significance of race and gender variables was calculated using contingency tables (Chi-square statistic). Unpaired t test was performed for significance analysis of remaining variables. A p-value  $\leq$  0.05 was considered significant.

**Supplementary Table S2** Associated network functions identified for specific genes differentially expressed between HCV-ACR and HCV recurrence disease

| Network ID | Genes in Network                                                                                                                                                                                                                                                                                                                                                           | Score | Focus Genes | Top Functions                                                                                                            |
|------------|----------------------------------------------------------------------------------------------------------------------------------------------------------------------------------------------------------------------------------------------------------------------------------------------------------------------------------------------------------------------------|-------|-------------|--------------------------------------------------------------------------------------------------------------------------|
| 1          | <b>BOLA1, BPHL, BRP44, CBARA1, COX11</b> ,<br>COX7A2, COX7A2L, COX7C (includes EG:1350),<br><b>COX8A</b> , D-glucose, ERO1L, G6PC, HNF1A,<br>HNF4A, <b>JTB, KDELC1, L2HGDH, MRPL33</b> ,<br>MUT, NSF, ONECUT1, PDCD4, <b>PDIA5</b> , RB1,<br>RPA2, RPLP1, <b>SLC17A2, SLC37A4</b> , SSSCA1,<br><b>TMEM176A, TMEM176B</b> , TRAPPC3, TRAPPC4,<br><b>TRAPPC6A</b>            | 33    | 16          | Carbohydrate<br>Metabolism,<br>Molecular<br>Transport,<br>Small<br>Molecule<br>Biochemistry                              |
| 2          | <b>ATF6B, BAD, BAG1, CAMK2N1</b> , Caspase,<br><b>DHPS</b> , DUSP4, EF-1 alpha, <b>EPOR</b> , ERK, ERRF1,<br>Estrogen Receptor, Histone h3, <b>ING4</b> , INSL3,<br>Mapk, Mapk kinase, Mek, <b>MGMT</b> , MOS, MST1,<br>NFkB (complex), <b>NFKBIE, NRG1</b> , PDE3A,<br><b>PEMT, PHB2</b> , Pi3-kinase, Pkc(s), <b>PKP1, PSMA2</b> ,<br>Ras, <b>SERPINF1</b> , TNNI3, Vegf | 29    | 15          | Cellular<br>Development,<br>Reproductive<br>System<br>Development<br>and Function,<br>Renal and<br>Urological<br>Disease |
| 3          | <b>ARG2</b> , Arginase, Ca <sup>2+</sup> , <b>COX8A, ENTPD4</b> , HAS1,<br><b>HEXA</b> , HEXB, IFNB1, IFNG, IGHMBP2, IL8,<br><b>KCNS3</b> , MIR122 (includes EG:406906),                                                                                                                                                                                                   | 25    | 13          | Cell<br>Signaling,<br>Small                                                                                              |

|   |                                                                                                                                                                                                                                                                                                                                                                                                              |    |    |                                                                               |
|---|--------------------------------------------------------------------------------------------------------------------------------------------------------------------------------------------------------------------------------------------------------------------------------------------------------------------------------------------------------------------------------------------------------------|----|----|-------------------------------------------------------------------------------|
|   | MRPS18B, <b>NDUFA2</b> , <b>NDUFC1</b> , <b>OASL</b> , <b>PMS2L3</b> ,<br>POLR2F, POLR2I, <b>POLR2J</b> , POLR2K, <b>PRG2</b> ,<br>PTEN, SETD7, TAF2, <b>TAF7</b> , TAF8, TAF15,<br>TAF6L, TBP, TNF, <b>VPS28</b> , VPS37A                                                                                                                                                                                   |    |    | Molecule<br>Biochemistry,<br>Lipid<br>Metabolism                              |
| 4 | <b>AHNAK</b> , CASP2, CCDC85B, <b>CLIC4</b> , Creatine<br>Kinase, DBP, <b>ETHE1</b> , <b>GOLGA3</b> , <b>HNMT</b> ,<br><b>HSD17B8</b> , JUN, KDM5B, KRT17, LSM2, LSM4,<br>LSM6, <b>LSM7</b> , MST1, MYOF, <b>N4BP1</b> , <b>NGFRAP1</b> ,<br>PERP, POP7, PPID, SMN1, SNRPD3, SUPT3H<br>(includes EG:8464), <b>SUPT7L</b> , TADA1, TADA2B,<br>TGFB1, <b>TMEM97</b> , <b>TOMM7</b> , TP53, TP53I3              | 22 | 12 | Cellular<br>Function and<br>Maintenance,<br>Cell Death,<br>Cell<br>Morphology |
| 5 | <b>ADH1C (includes EG:126)</b> , ANXA2, AP1G1,<br>AP2B1, <b>AP2S1</b> , AREG, AXL, beta-estradiol, <b>CD99</b><br><b>(includes EG:4267)</b> , <b>CUTA</b> , EFS, ERBB,<br><b>FAM162A</b> , G-protein gamma, GAB2, GNG2,<br><b>GNG5</b> , GNG7, Gpcr, GRB2, MBTPS1, <b>MPDU1</b> ,<br>PHKA2, PPIA (includes EG:5478), <b>PPP1R3C</b> ,<br>PSMC5, RARA, RPL13, RPS3A, RPS6KA2,<br>SHBG, SRC, SYP, TNK2, TRIM24 | 14 | 8  | Tissue<br>Development,<br>Gene<br>Expression,<br>Molecular<br>Transport       |

Differentially expressed genes in HCV recurrence disease and HCV-ACR are represented in red and green bold letter, respectively.
